# Supplementary material
Source: Research Square preprint supplement (doi:10.21203/rs.3.rs-9442451/v1)
Supplement: Supplementary file 1 [file a080f9ac809eef55dc833958.pdf]

**Supplementary Table 1. Primers for qRT-PCR.**

Primers used for qRT-PCR to calculate gene expression levels were listed.

|                |         |                          |
|----------------|---------|--------------------------|
| <i>Rps7</i>    | Forward | GTCCCAGAAGCCGCACTTTGAC   |
|                | Reverse | CTCTTGCCCACAATCTCGCTCG   |
| <i>Cd209</i>   | Forward | CATGCTCCTGGTGACCACTC     |
|                | Reverse | CCTGAGAAACATCCCCGAGGC    |
| <i>Tmprss7</i> | Forward | TCCACTTTGTGGGATCTGCC     |
|                | Reverse | GGGTCTGACAGCCTGTTTCC     |
| <i>F11r</i>    | Forward | GACGAGGCTACTTTGACAGAAC   |
|                | Reverse | CACACCAGGAATGACGAGGT     |
| <i>Slamf1</i>  | Forward | AGAAGAAACCTGATGCCCCG     |
|                | Reverse | ATGGACTTTGGTTCCTGGACA    |
| <i>Tfrc</i>    | Forward | TCCTCTTGGAACCTGCACGG     |
|                | Reverse | GAGGAAAGGTATCCCTCTAGCC   |
| <i>Slc10a1</i> | Forward | GAAGGGGGACATGAACCTCA     |
|                | Reverse | ATATCACAATGCCTCCATAAGGTA |
